# Supplementary material
Source: MDPI journal article supplement (https://www.mdpi.com/2073-4352/9/9/446)

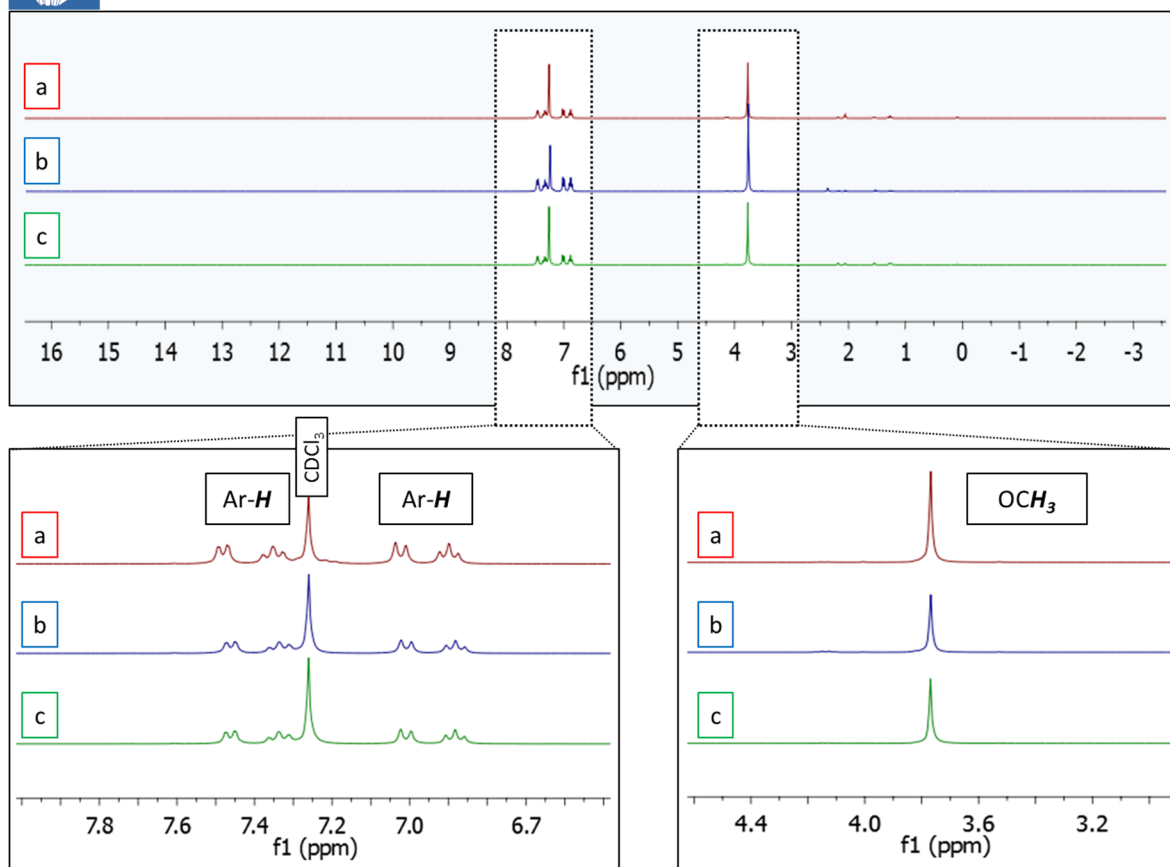

Overlay of obtained <sup>1</sup>H-NMR spectra from various sources respectively: **a)** CS **b)** CS synthesized in the own lab for control and **c)** RM-SFW

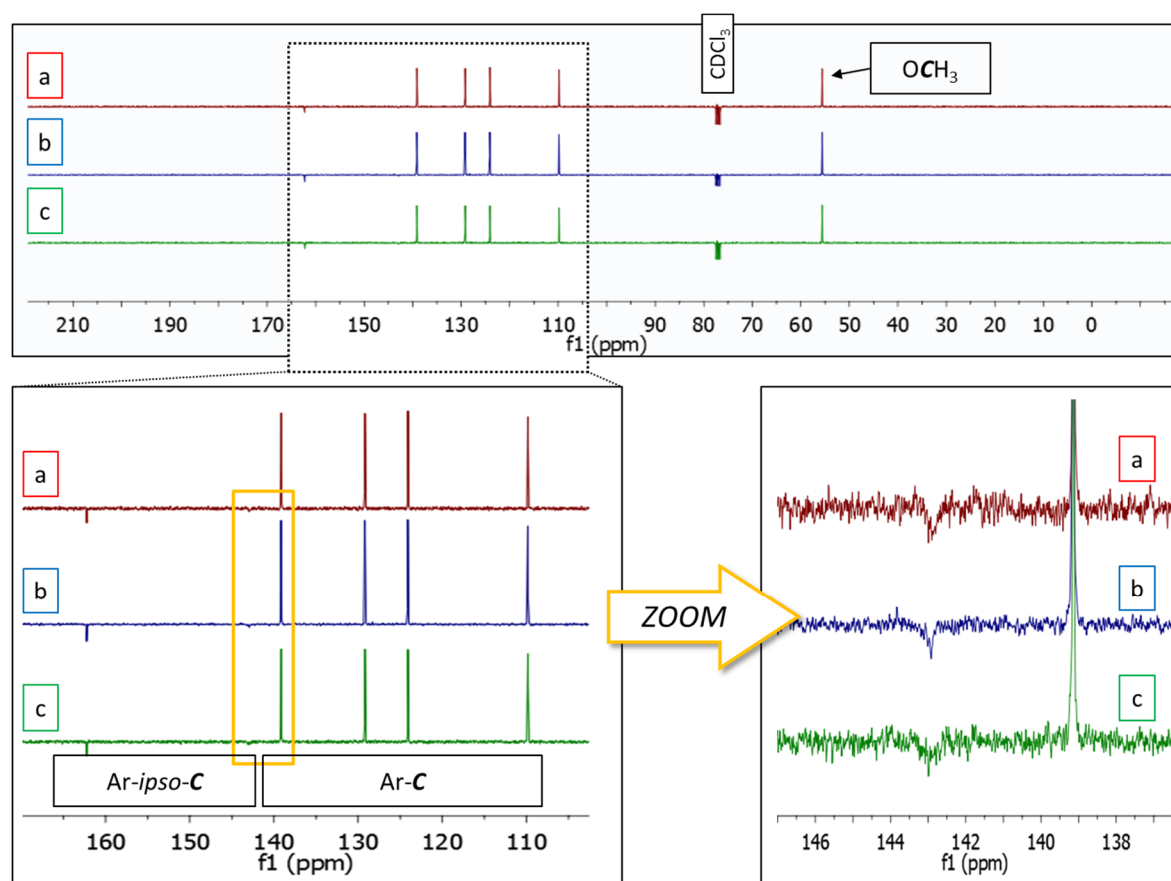

**Figure 2:** Overlay of APT-NMR spectra from various sources respectively: a) CS b) CS synthesized in the own lab for control and c) RM-SFW

SEM:

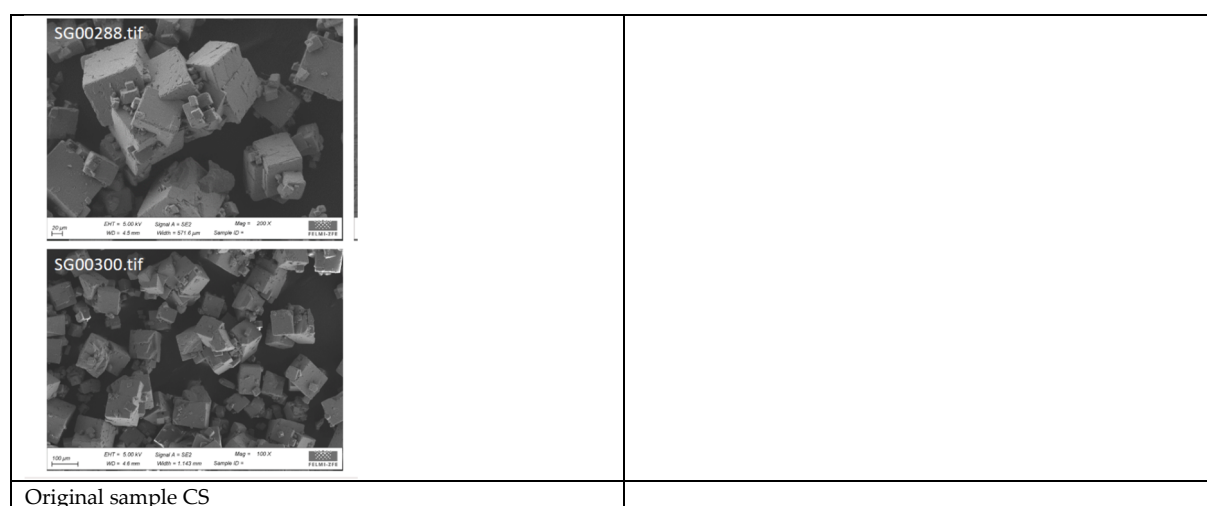

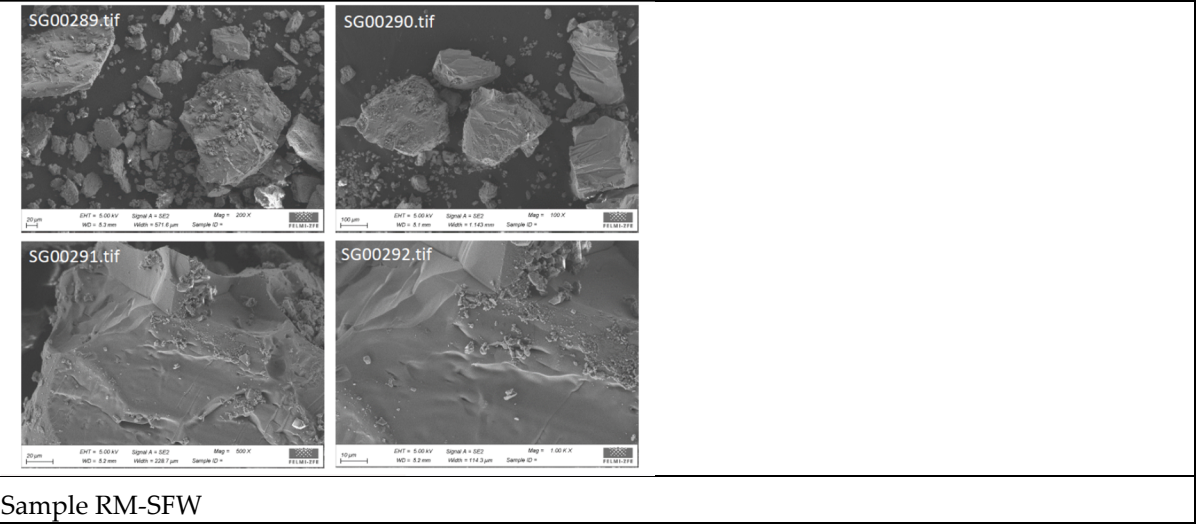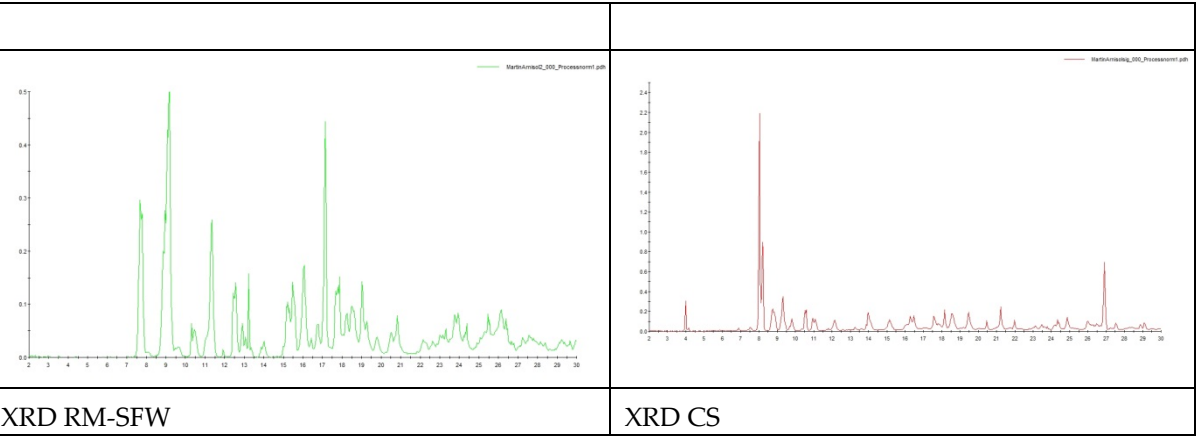

Supplement: s1 [file s1]
